# Supplementary material for: Generation of a Dystrophin Mutant in Dog by Nuclear Transfer Using CRISPR/Cas9-Mediated Somatic Cells: A Preliminary Study
Source: MDPI journal article supplement (doi:10.3390/ijms23052898), 2022-03-07
Supplement: s1 [file s1]

## Article

# Generation of a Dystrophin Mutant in Dog by Nuclear Transfer Using CRISPR/Cas9-Mediated Somatic Cells

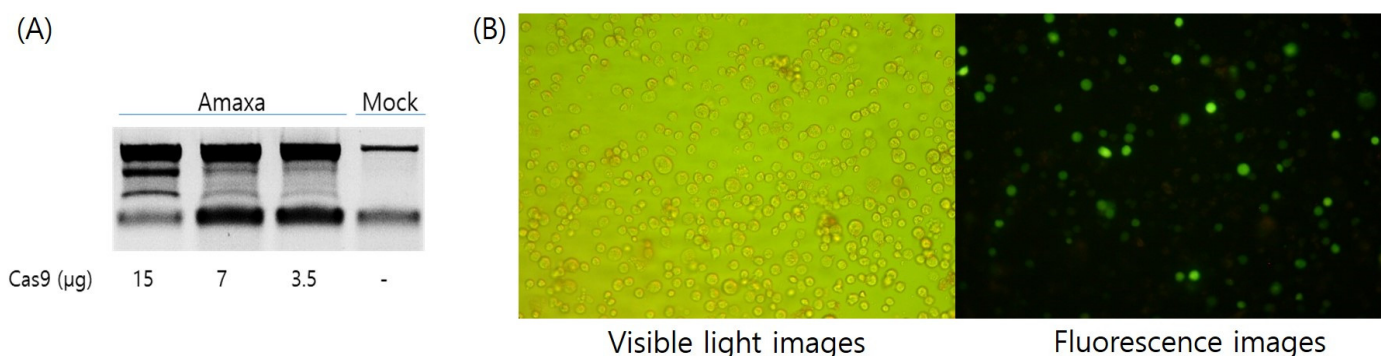

**Supplemental Figure S1.** Genome editing in Canine fetal fibroblast via RNP delivery. (A) Mutations were detected by T7E1 assay. A mixture of Cas9 protein and in vitro transcribed sgRNA (20 μg) was transfected into 2x10<sup>5</sup> cells. (B) Fibroblasts expressing green fluorescence protein transiently(original magnification 100X).

| Total Sequences | With both indicator sequences | More than minimum frequency | Insertions | Deletions | Indel frequency | HDR frequency |
|-----------------|-------------------------------|-----------------------------|------------|-----------|-----------------|---------------|
| 71232           | 51673                         | 51396                       | 0          | 51396     | 51396 (100.0%)  | 0 (0.0%)      |

| ID | Sequence                                                                                                                                                                                                                                                                                                                    | Length | Count | Type | HDR |
|----|-----------------------------------------------------------------------------------------------------------------------------------------------------------------------------------------------------------------------------------------------------------------------------------------------------------------------------|--------|-------|------|-----|
| 1  | <div><div>TGAGCTGGGTCCGACAATCAACTCGTAATTATCCACAGGTTAATGTCATTAACTTCCACCACAGCTGGTCTGTTGGCTGGGCTTT</div><div>     </div><div>TGAGCTGGGTCCGAC-----ATGGCTGGGCTTT</div><div>GAACGCTCTCATCCACAGTCTATAGGTAAGGAGACCACTGAGATATTGACTAATT</div><div>     </div><div>GAACGCTCTCATCCACAGTCTATAGGTAAGGAGACCACTGAGATATTGACTAATT</div></div> | 83     | 47491 | Del  | N/A |
| 2  | <div><div>TGAGCTGGGTCCGACAATCAACTCGTAATTATCCACAGGTTAATGTCATTAACTTCCACCACAGCTGGTCTGTTGGCTGGGCTTT</div><div>     </div><div>TGAGCTGGGTCCGAC-----ATGGCTGGGCTTT</div><div>GAACGCTCTCATCCACAGTCTATAGGTAAGGAGACCACTGAGATATTGACTAATT</div><div>     </div><div>GAACGCTCTCATCCACAGTCTATAGGTAAGGAGACCACTGAGATATTGACTAATT</div></div> | 83     | 120   | Del  | N/A |
| 3  | <div><div>TGAGCTGGGTCCGACAATCAACTCGTAATTATCCACAGGTTAATGTCATTAACTTCCACCACAGCTGGTCTGTTGGCTGGGCTTT</div><div>     </div><div>TGAGCTGGGTCCGAC-----ATGGCTGGGCTTT</div><div>GAACGCTCTCATCCACAGTCTATAGGTAAGGAGACCACTGAGATATTGACTAATT</div><div>     </div><div>GAACGCTCTCATCCACAGTCTATAGGTAAGGAGACCACTGAGATATTGACTAATT</div></div> | 83     | 100   | Del  | N/A |

**Supplemental Figure S2.** Targeted mutagenesis in dog cells by CRISPR/Cas9. The result of deep sequencing of mutant dog cells. Target Sequence of the sgRNA is underlined within the genomic sequence of DMD gene. Red boxes represent a protospacer-adjacent motif (PAM) sequence.

## Mismatch 0 ; 1 / Mismatch 1 ; 0 / Mismatch 2 ; 2 / Mismatch 3 ; 16

|    | Target                                                          | Chromosome | Position | Direction | Mismatches |           |
|----|-----------------------------------------------------------------|------------|----------|-----------|------------|-----------|
| 1  | crRNA: TTCACCACCAGCTGGTCTGANGG<br>DNA: cTctCCACCAGCTGGTCTGgGGG  | chr24      | 22878368 | +         | 3          |           |
| 2  | crRNA: TTCACCACCAGCTGGTCTGANGG<br>DNA: TTCACCTCCAGCTGtTCTaATGG  | chr8       | 29061641 | +         | 3          |           |
| 3  | crRNA: TTCACCACCAGCTGGTCTGANGG<br>DNA: TTCACaAgCAGCTGGaCTGAGGG  | chr12      | 4938755  | +         | 3          |           |
| 4  | crRNA: TTCACCACCAGCTGGTCTGANGG<br>DNA: TTCACCACattCTGGTCTGAAGG  | chr3       | 26238745 | +         | 3          |           |
| 5  | crRNA: TTCACCACCAGCTGGTCTGANGG<br>DNA: TTCACCACCACcCTGGcCTGATGG | chr3       | 50964839 | -         | 2          |           |
| 6  | crRNA: TTCACCACCAGCTGGTCTGANGG<br>DNA: cGcCCACCAGCTGGTCTGACGG   | chr3       | 57426757 | +         | 3          |           |
| 7  | crRNA: TTCACCACCAGCTGGTCTGANGG<br>DNA: TTCACCcCCAGCTGaTCTGgGGG  | chr3       | 62735685 | +         | 3          |           |
| 8  | crRNA: TTCACCACCAGCTGGTCTGANGG<br>DNA: TTCACCAGcAGCTGGTaTgTGG   | chr3       | 73060142 | +         | 3          |           |
| 9  | crRNA: TTCACCACCAGCTGGTCTGANGG<br>DNA: aTCAGcACCAGCTGGcCTGAGGG  | chr25      | 45357425 | -         | 3          |           |
| 10 | crRNA: TTCACCACCAGCTGGTCTGANGG<br>DNA: TTCACCACCACacGGTCTGAAGG  | chr1       | 16905540 | -         | 3          |           |
| 11 | crRNA: TTCACCACCAGCTGGTCTGANGG<br>DNA: TTCACCACCAGCTGGaCaGATGG  | chr1       | 35850847 | +         | 2          |           |
| 12 | crRNA: TTCACCACCAGCTGGTCTGANGG<br>DNA: TTCACCACCAGCTGGaggGATGG  | chr1       | 1.13E+08 | -         | 3          |           |
| 13 | crRNA: TTCACCACCAGCTGGTCTGANGG<br>DNA: TTCAGcAtCAGCTGGcCTGACGG  | chr33      | 17707648 | +         | 3          |           |
| 14 | crRNA: TTCACCACCAGCTGGTCTGANGG<br>DNA: TTCACCAtCAGcGGTCTGtAGG   | chr20      | 56928844 | +         | 3          |           |
|    | crRNA: TTCACCACCAGCTGGTCTGANGG<br>DNA: TTCACCACCAGCTGGTCTGATGG  | chrX       | 27933928 | -         | 0          | On target |
| 15 | crRNA: TTCACCACCAGCTGGTCTGANGG<br>DNA: aTCACCACCAGCTGagCTGAAGG  | chrX       | 1.06E+08 | +         | 3          |           |
| 16 | crRNA: TTCACCACCAGCTGGTCTGANGG<br>DNA: aTCACCACCAGCTGagCTGAAGG  | chrX       | 1.06E+08 | -         | 3          |           |
| 17 | crRNA: TTCACCACCAGCTGGTCTGANGG<br>DNA: TTCACCACCAGCTGGagaGATGG  | chr18      | 50645543 | +         | 3          |           |
| 18 | crRNA: TTCACCACCAGCTGGTCTGANGG<br>DNA: TgCACCACCAGCaGGTCTGcAGG  | chr28      | 32426415 | -         | 3          |           |

Supplemental Figure S3. Potential off-target sites with up to 3 mismatches, relative to the wild-type sequence.

## Off-target Analysis

|    | Total Sequences | With both indicator sequences | More than minimum frequency | Insertions | Deletions | Indel frequency |
|----|-----------------|-------------------------------|-----------------------------|------------|-----------|-----------------|
| 1  | 13213           | 11325                         | 10553                       | 0          | 68        | 68 (0.6%)       |
| 2  | 14376           | 13779                         | 13442                       | 0          | 7         | 7 (0.1%)        |
| 3  | 12183           | 11326                         | 10835                       | 0          | 9         | 9 (0.1%)        |
| 4  | 15741           | 15231                         | 14892                       | 0          | 18        | 18 (0.1%)       |
| 5  | 15043           | 14459                         | 14088                       | 0          | 2         | 2 (0.0%)        |
| 6  | 14224           | 12056                         | 11843                       | 0          | 4         | 4 (0.0%)        |
| 7  | 11372           | 10141                         | 9789                        | 0          | 3         | 3 (0.0%)        |
| 8  | 12832           | 12439                         | 12244                       | 0          | 2         | 2 (0.0%)        |
| 9  | 330652          | 11629                         | 11439                       | 0          | 2         | 2 (0.0%)        |
| 10 | 339871          | 8548                          | 8240                        | 0          | 2         | 2 (0.0%)        |
| 11 | 336445          | 9669                          | 9364                        | 0          | 0         | 0 (0.0%)        |
| 12 | 295067          | 8274                          | 8135                        | 0          | 0         | 0 (0.0%)        |
| 13 | 245902          | 9766                          | 9577                        | 0          | 0         | 0 (0.0%)        |
| 14 | 280667          | 9419                          | 8966                        | 0          | 0         | 0 (0.0%)        |
| 15 | 256539          | 10355                         | 10007                       | 0          | 0         | 0 (0.0%)        |
| 16 | 235573          | 9310                          | 8534                        | 0          | 0         | 0 (0.0%)        |
| 17 | 337899          | 8469                          | 8107                        | 0          | 0         | 0 (0.0%)        |
| 18 | 373015          | 7996                          | 7691                        | 0          | 0         | 0 (0.0%)        |

  

|    |   |                                                                                 |    |      |           |
|----|---|---------------------------------------------------------------------------------|----|------|-----------|
| #6 | 1 | GTTTGTGTTAGCCGCCCCACCAAGCTGGTCTGACGGCCAGGTCCTATGCTCGCTCTTGCTGGCCATCCATTCCCCAGCA | 78 | 6126 | WT or Sub |
|    |   |                                                                                 |    |      |           |
|    |   | GTTTGTGTTAGCCTCCCCACCAAGCTGGTCTGACGGCCAGGTCCTATGCTCGCTCTTGCTGGCCATCCATTCCCCAGCA |    |      |           |
|    |   |                                                                                 |    |      |           |
| #6 | 2 | GTTTGTGTTAGCCGCCCCACCAAGCTGGTCTGACGGCCAGGTCCTATGCTCGCTCTTGCTGGCCATCCATTCCCCAGCA | 78 | 4872 | WT or Sub |
|    |   |                                                                                 |    |      |           |
|    |   | GTTTGTGTTAGCCGCCCCACCAAGCTGGTCTGACGGCCAGGTCCTATGCTCGCTCTTGCTGGCCATCCATTCCCCAGCA |    |      |           |
|    |   |                                                                                 |    |      |           |

**Supplemental Figure S4.** No off-target mutations at candidate sites in dystrophin mutant dog. Indel frequencies at potential off-target sites were analyzed using targeted deep sequencing. Off-target candidate #6 had 1 bp substituted allele which is pre-existed SNP not caused by CRISPR/Cas9.

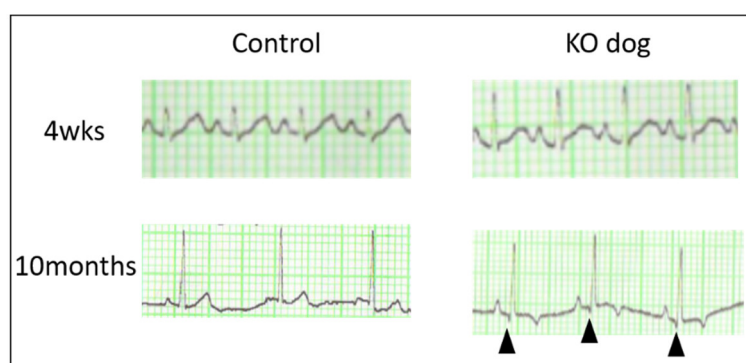

**Supplemental Figure S5.** Electrocardiogram changes according to age in normal and *dystrophin* mutant dogs. Arrows indicate the Q wave in the dystrophin mutant dog.

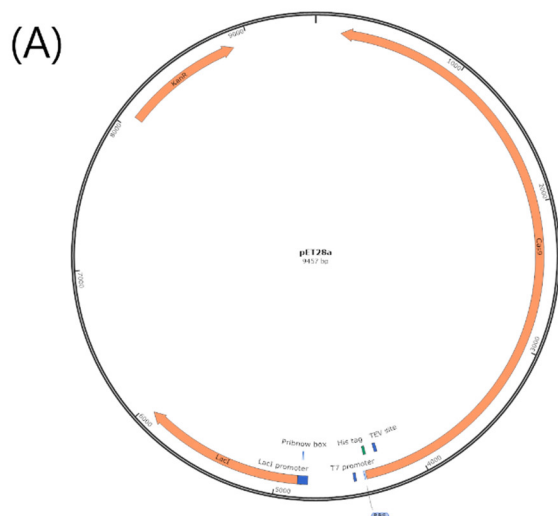

(B)

agtgcatctgcggttttcaacaacaactgcaaatgctgaatgaggcgcatgttccactcgatgctgttgcacaag  
tcagatggcgctggggcgcaatgcgcgcattaccgacgtccggcgctgtgtgtgctggatctcgtgtagggaatag  
acgataccgaagacagctactgttatctccgcgtttaaccacatacaaacagattgttccgtctggggcgcaaacg  
gtggacgccttctgcaactctgacgtgcgcgcagcgggtgaaggcgcaatcagctgttccgtctcactgctgtaaaagaa  
aaccacctggcgccaatacgcgaacccgctctcccgcggtgtggccgaltcaattagtcagctggcacgacaggttt  
ccgacttgaaaagcggcgatgtagcgcaacgcaatlaagtatgatacactattaggcaccgggactctgcaccgat  
gcccctlgagagccttaaccctgactgctctccgggtggggcgggggactgactatcgtccgcactatgactgctct  
tctttatcagcaactcgatcgtgacgtgcgcgcagctctctgggtctatttccgtgcggcagcgcctttcgtgcgcgcg  
acgatgatcgccgtctgctgtgcgttatcggaactctgcacgccccgtctcaagcctctgctacgtgtcccgccacca  
acgtttccggcgagaagcaggcctatctgcgcgcgtggcgccccacgggtgctgcatgctgtgctctgtctgtgtagga  
cccgctagcgtcgggggtgtgcttactggtttagcagaatgaatcacgatacgcgagcgaaacgtgaagcgactgctgc  
tgcgaacgcgtcgcgactgagcaacaacgaatgtgtcttgcgtgttctgttctgaagtctggaacgcggaacgtgctgc  
agcgccctgcacattatgttccggatctgcgcaggtgatcgacgatgctgtgctggaacacctacatctattata  
cgaagcgtcggcaltgacctgagtgatttttctgtctccgcgcatccatacccgactgtttacctcacaacgt  
tccagtaacccggcatgttcaatcatgataaccgttatcgtgagcatcctctctgttactcggtatcattaccccat  
gaacagaatacccccttaccgaggacatgagcaacaacggaaaaaacgcgcccttaacatggcccgtttatcagaa  
gcgcagacttaacgctctctggagaacaactcagcggtgcagcgaggatgaagcaagacacatgtgtaactcgtcacgac  
cagctgatgagctttaccgcagctgctcgcgctgttctgtagtcagggtgaacaaacctctgacatgacgtcccgga  
gacgctgcacagctgtctgtaagcggatgccgggagcagacaagcccgtagggcgctgacgggtgtgtgggggtgtc  
ggggcgacgcaatgaccagtcacgatcgatagcggagtgatatactgcttaactatcgcgcatcagacgagatgtac  
tgagagtgccacatatactgggtgtgaataacgcagatgctgaaggagaataacggccatcaggcgctcttgcgtt  
ctcgtctactgactgctgtcgtcgtctgttccgtgcggcgagcgtatcacactcaagggcagataactgta  
tccacagaatcaggggataacgcaggaagaacatctlgagcaaaaggccagcaaaaggccagggaacgttaaaaggccgc  
gtgtcgtgggttttccataggctcgcgccccctgacgagcatcaaaaaactgacgctcaagtgcagaggtggcgcaaac  
cgacagactaataagatacaggcgtttccccggaagctcctcgtgctctctcttccagacctgcgcttacc  
ggatacctgtccgcttctcctctgggaagcgtggcgctttctcagacactgtaggtatctatcagttcgtgtgta  
ggctgttctcgtaagctgggctgtgtgtgcgaacccccctgttcagcgacgctgcgctctatccggttaactatgct  
ttagtgccaacccggtaagacacgactatcgccactgcgagcagccacttggaacaggattagcagagcgaggtatga  
ggcggtgtcagagattcttgaagtgggtgcctactacgctacatcagaaggacagatttgtatctcgctcgtcgt  
gaagccagttaccttgcgaaaaagctgtagagcttctgacggaacaaacaccctggtagcgggtttttttg  
tttgacagcagatattacgcgcagataaactgcgaatacaagaagctttactttatcaggaactctgtgacgtcag  
tggaaacgaataactcgtaagggaatttggctatgaacataaaactgtctgtcatacaaaagcaataacaaagggtg  
ttatggccattatcaacggaaacgtctgtcttagcgcgcgattaaattcaacatgatgtgctattatattgggtat  
aaatggcgctcgataattgtcgggcaatcaggtgcgaacatctcagattatgggaagcccgatgcgcgaagattgtt  
tctgaacatcggaaggtagcgtgtccaatgatgttacagatgagatgtgcagactaactcgtgtgacggaatttagt  
ctttcgcacatacaagctttatctgactctgattgagctgttactcaactcagctccgggaacaaacgca  
ttccaggtattagaataactctgattcaggtgaaaaattgttgatgcgtgcagtgcttctcgccgggtgtcattc  
gattcgtgtttgaattgtcttttaaacgagatcgctgatttctgtcgtcaggcgcaatcagatgaataacggtt  
tgggtgatcgagtgattttgatgacgagcgtatgtggcgctgttgaaacagtctggaagaagaatgcataaactttg  
ccattctaccggattgactgtcactcatggtattcttcaacttaacacttatttgacgggggaataatagg  
ttgtattgatgttgacgagctggaatacgcgacgtacacagactgttccatctatggaactctgcgttgatgtt  
ctctctcattacagaacggcttttcaaaaatattggtatgataactgatatgaataaattcagtttatttgatg  
ctcgtatgatttttcaagaatttaattcatgagcggatacatatttgaattgattagaaaaataacaattagggttc  
cgcgcatattccccgaaaagtgccactgaaattglaaacgtttaattttgtaaaattcgggttaattttgttaa  
atcagctctttttaaaccataggcgcaaaactcggcaaaactgaataacaaatagacgcagatagatgtgtgag  
tgtgtttcagtttgggaacagatgctcaataaaagaacgtggactcaacgtcaaaaggcgaaaaacgctctacagg  
ggcatggcccatcagtglaaccatacccttaacgaatttttggggctgagggtgcgtaaacactaaatcggaaacct  
aaaggagagcccgattagagcttgacgggggaagcgcgcagctgtggcgagaagggaagggaagaagcgaaaggagc  
ggggcgctggggcgctggcaagltagcgggtcaegctgcgcgtaaccaaccaccccgcgcttaatgcgcgctacagg  
gcgcgtcttactccga

**Supplemental Figure S6. pET vector. (A) vector map (B) vector sequence**

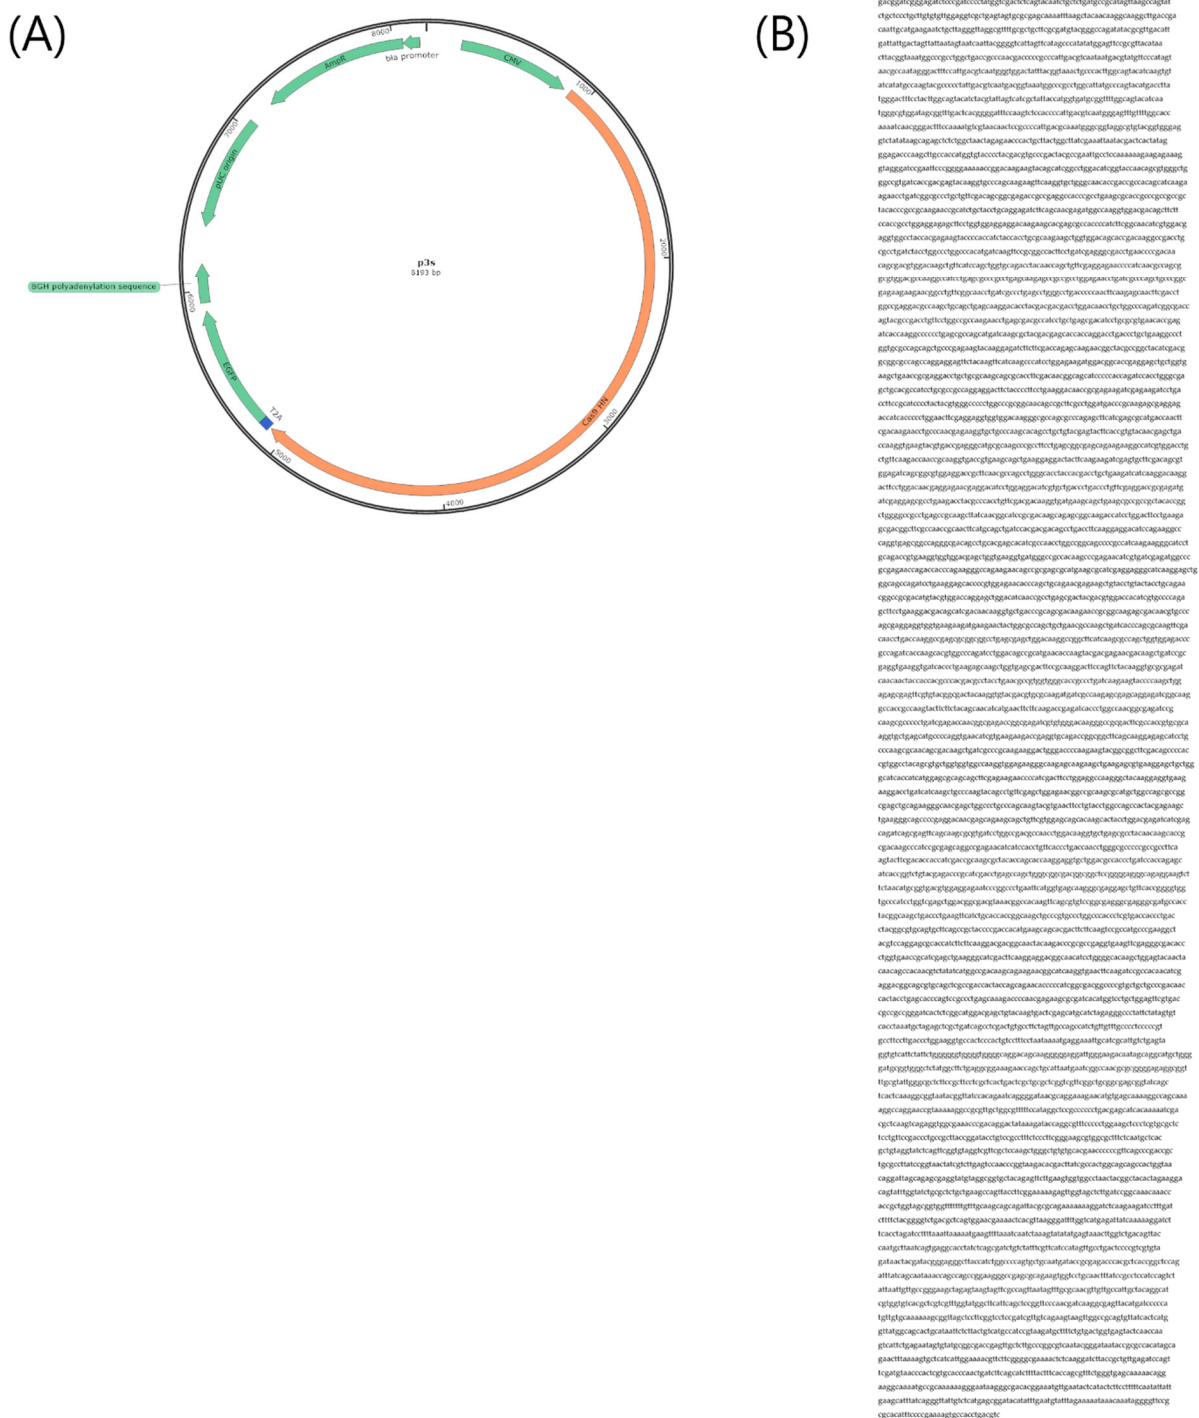

**Supplemental Figure S7.** p3s-Cas9-2A-GFP vector vector. (A) vector map (B) vector sequence

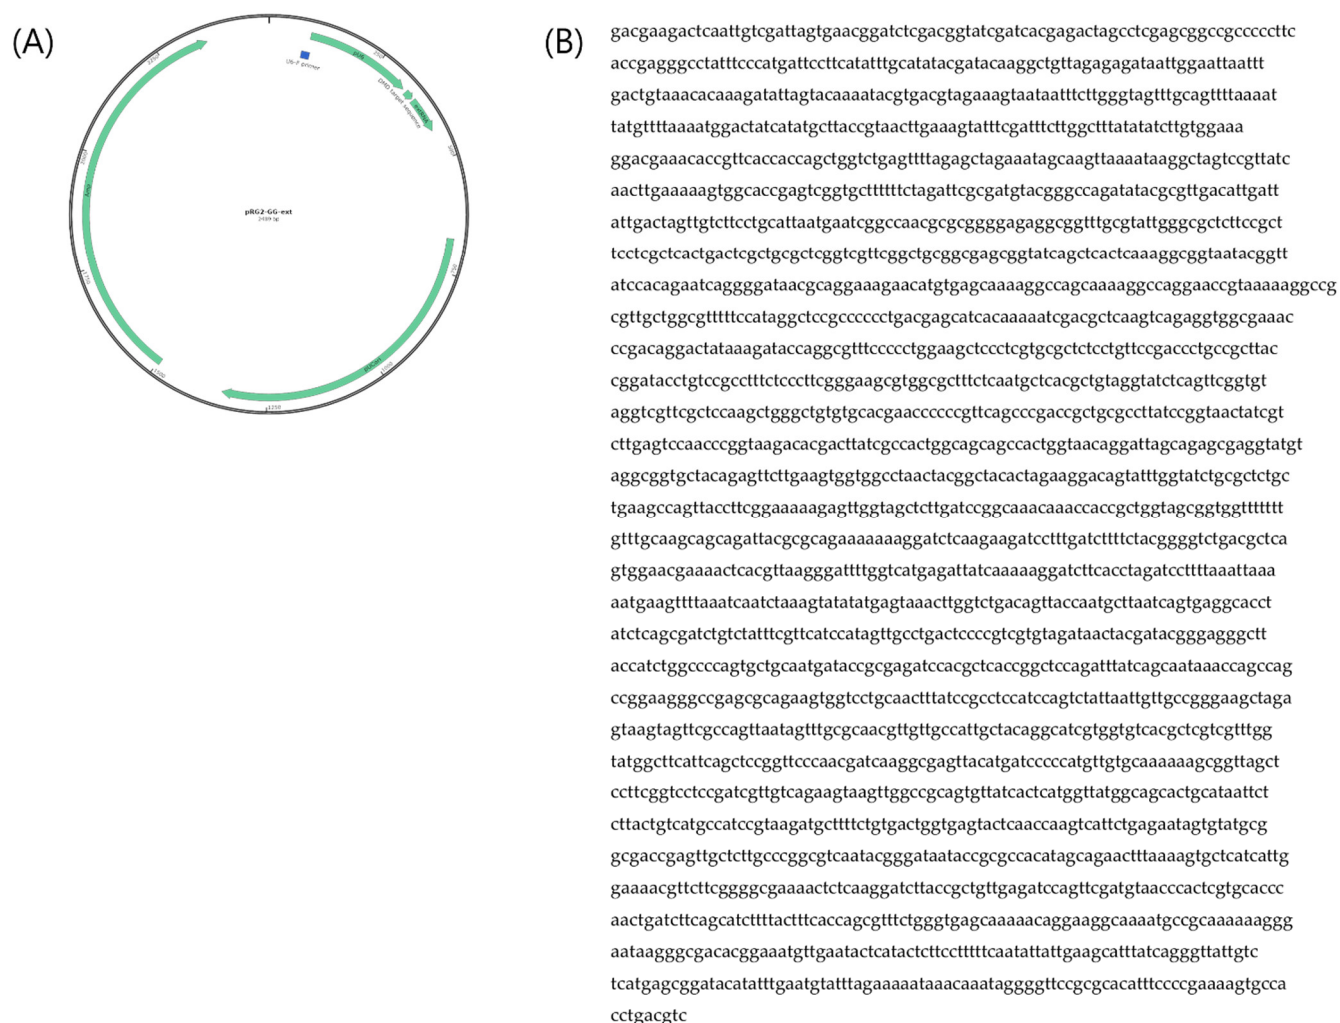

Supplemental Figure S8. pRG2-sgRNA vector. (A) vector map (B) vector sequence

**Supplemental Table S1.** Parameters of MRI sequences.

|                      | T1 Axial  | T1 Axial CE | T2 Coronal | T2 Axial  | T2 IDEAL  |
|----------------------|-----------|-------------|------------|-----------|-----------|
| Sequence             | FSE       | FSE         | FSE        | FSE       | FSE       |
| FOV (cm)             | 18 × 18   | 18 × 18     | 18 × 18    | 18 × 18   | 18 × 18   |
| Slice thickness(mm)  | 3         | 3           | 3          | 3         | 3         |
| Interslice gap (mm)  | 0.3       | 0.3         | 0.3        | 0.3       | 0.3       |
| Relaxation time (ms) | 759       | 1478        | 4315       | 5313      | 7313      |
| Echo time (ms)       | 10.1      | 10.1        | 71.6       | 71.8      | 66.6      |
| Matrix               | 256 × 192 | 256 × 192   | 256 × 192  | 256 × 192 | 256 × 224 |
| Nex                  | 4.00      | 4.00        | 4.00       | 4.00      | 3.00      |

CE, contrast enhanced; FSE, fast spin echo; FOV, field of view

**Supplemental Table S2.** T2 values of each hind-limb muscle

| T2 values        | Control dog | <i>Dystrophin</i> mutant dog |
|------------------|-------------|------------------------------|
| Rectus femoris   | 38.1        | 62.8                         |
| Vastus lateralis | 36.7        | 41.9                         |
| Vastus medialis  | 41.5        | 45.4                         |
| Biceps femoris   | 40          | 39.5                         |
| Semitendinosus   | 37.3        | 41.4                         |
| Semimembranosus  | 37.1        | 40.6                         |
| Adductor magnus  | 40.3        | 49.3                         |
| Mean ± SD        | 38.7 ± 1.9  | 45.8 ± 8.2                   |

SD, standard deviation

**Supplemental Table S3.** List of primers used for targeted deep sequencing

| <b>Primers used for T7E1 assay and Deep Sequencing of on-target site</b> |                                                       |
|--------------------------------------------------------------------------|-------------------------------------------------------|
| Fwd_1st                                                                  | GACACCTACCAATCAGAGTAGATTCC                            |
| Rev_1st                                                                  | CAGTGGATAGTCAGATCAGTATGG                              |
| Fwd_2nd                                                                  | GAATGGACTCCGTCCTGGTAG                                 |
| Rev_2nd                                                                  | GAAATGAGCTGGAACCACACTGG                               |
| Fwd_DS                                                                   | ACACTCTTTCCCTACACGACGCTCTTCCGATCTTGGATTGCAACAAACCAACA |
| Rev_DS                                                                   | GTGACTGGAGTTCAGACGTGTGCTCTTCCGATCTTGAACCACACTGGTGAAAA |
| <b>Primers used for Deep Sequencing of off-target site</b>               |                                                       |
| DogDMD_Off_1_O_F                                                         | AGGACACCCAGGTCCTTACC                                  |
| DogDMD_Off_1_O_R                                                         | CCACTGTGTTCTTCCCAGGT                                  |
| DogDMD_Off_2_O_F                                                         | TGCACCTGGTCTTAGCTCCT                                  |
| DogDMD_Off_2_O_R                                                         | TCCTCCTTCTGCCTGTGTCT                                  |
| DogDMD_Off_3_O_F                                                         | GACTCAATCCCAGGTCTCCA                                  |
| DogDMD_Off_3_O_R                                                         | CCATTTTCGGCAGAAAATCAT                                 |
| DogDMD_Off_4_O_F                                                         | GCTGGATCCTGGGTAGACAA                                  |
| DogDMD_Off_4_O_R                                                         | CCAATGTGGGACTTGATCCT                                  |
| DogDMD_Off_5_O_F                                                         | TCACCTAGGCATGCATTCAA                                  |
| DogDMD_Off_5_O_R                                                         | CCCCCTGGTTGACTAATGTG                                  |
| DogDMD_Off_6_O_F                                                         | CAGCTCTGAAGGACCACACA                                  |
| DogDMD_Off_6_O_R                                                         | CAGCAGGTAAACACCAAGCA                                  |
| DogDMD_Off_7_O_F                                                         | CATGGAGGACACGATGCTAA                                  |
| DogDMD_Off_7_O_R                                                         | GTGCAGGCAGCAACTTGTA                                   |
| DogDMD_Off_8_O_F                                                         | AAACTCCTTTTTTGGGGCCTA                                 |
| DogDMD_Off_8_O_R                                                         | TCCTCCTCTCATCTGGGCTA                                  |
| DogDMD_Off_9_O_F                                                         | GGGATTTTGTTCCTCAAGGTT                                 |
| DogDMD_Off_9_O_R                                                         | GAGAAGAATTTGGGGGAAGC                                  |
| DogDMD_Off_10_O_F                                                        | AACCGCAAACCAATACAAGG                                  |
| DogDMD_Off_10_O_R                                                        | GGGAAAGACAGACCTTCACG                                  |
| DogDMD_Off_11_O_F                                                        | TAGGGTTGCCATCACAAGGT                                  |
| DogDMD_Off_11_O_R                                                        | TCAGGAATGTCCTGGCTCT                                   |
| DogDMD_Off_12_O_F                                                        | AGAGTACATGGCCTGGATGG                                  |
| DogDMD_Off_12_O_R                                                        | GATGGAGACTGGGCTCTCTG                                  |
| DogDMD_Off_13_O_F                                                        | TCCCATGAAAGAGGATCCAG                                  |
| DogDMD_Off_13_O_R                                                        | TGTGTGGTCTCCCTGTGTA                                   |
| DogDMD_Off_14_O_F                                                        | TTGCAGTGGTGGAGAGAGTG                                  |
| DogDMD_Off_14_O_R                                                        | TGTGGGTCACAGAACTGGAA                                  |
| DogDMD_Off_15_O_F                                                        | TTGGTTTGGTTGGTGCAGTA                                  |
| DogDMD_Off_15_O_R                                                        | CAGTTGACGGCAGTTGAGAA                                  |
| DogDMD_Off_16_O_F                                                        | CAGTTGATGGCAGTTGAGAA                                  |
| DogDMD_Off_16_O_R                                                        | TTGGTTTGGTTGGTGCAGTA                                  |
| DogDMD_Off_17_O_F                                                        | CCATCCATCATCCTTTGCTT                                  |
| DogDMD_Off_17_O_R                                                        | TGAAAGCGTTTTGCAGATTG                                  |
| DogDMD_Off_18_O_F                                                        | GCTTCTTGGAGGAGCAACAC                                  |
| DogDMD_Off_18_O_R                                                        | CAGGGAACAGGCTGTGGTAT                                  |
| DogDMD_Off_1_i_F                                                         | CCAGGACAGCAGGAAGAAAG                                  |
| DogDMD_Off_1_i_R                                                         | GCCTCCTGGTGGATTATGAA                                  |
| DogDMD_Off_2_i_F                                                         | CCTCTTGATGAGTCCCATTGA                                 |
| DogDMD_Off_2_i_R                                                         | GGGAAACTTTTGTTCCTTT                                   |

|                   |                                                           |
|-------------------|-----------------------------------------------------------|
| DogDMD_Off_3_i_F  | CTCACTTCAGGCTTGCCTCT                                      |
| DogDMD_Off_3_i_R  | TCCCCTCACCTTGACTTCAG                                      |
| DogDMD_Off_4_i_F  | TGCCTTAACCATTTCTATCCTCA                                   |
| DogDMD_Off_4_i_R  | GCGTCCCCCTGTTTAATCTT                                      |
| DogDMD_Off_5_i_F  | TTCTACCCAAAGCAGCCACT                                      |
| DogDMD_Off_5_i_R  | TCCAAACCTTTCCTTGTGCT                                      |
| DogDMD_Off_6_i_F  | CCTGTGGTCTGGTGACATTG                                      |
| DogDMD_Off_6_i_R  | CACACCTGACACTTGGCTGT                                      |
| DogDMD_Off_7_i_F  | CAAGCCAGACACAAAAGCAA                                      |
| DogDMD_Off_7_i_R  | CACCCAATGCCTAGCTCTTC                                      |
| DogDMD_Off_8_i_F  | AGGAAAAGTTGGGACGGTCT                                      |
| DogDMD_Off_8_i_R  | CAGGTTCTACCTCGCTCTG                                       |
| DogDMD_Off_9_i_F  | TTCACAACCCCGTGGATAAT                                      |
| DogDMD_Off_9_i_R  | TGTGTGGATCAGAGCAGAGG                                      |
| DogDMD_Off_10_i_F | CCCCAGTCACTGATCCCTTA                                      |
| DogDMD_Off_10_i_R | GAGCTCACGGCTGGACTTAC                                      |
| DogDMD_Off_11_i_F | CTTTTGAGGCTTCCCTCCTT                                      |
| DogDMD_Off_11_i_R | GACACTGCACTGTGGCATT                                       |
| DogDMD_Off_12_i_F | GGGTCTTCGCATCTATGTGT                                      |
| DogDMD_Off_12_i_R | CCCTTCTTTCTTTCCCCATC                                      |
| DogDMD_Off_13_i_F | CATCCCTGAACACTCCTGGT                                      |
| DogDMD_Off_13_i_R | CAGGTTTGGAGGATCTTGGA                                      |
| DogDMD_Off_14_i_F | CTGGGAGACACTGTGCGTAG                                      |
| DogDMD_Off_14_i_R | GAGGGAAACGGACAGCACTA                                      |
| DogDMD_Off_15_i_F | CCTGTCAAAGGTGGAAGCAT                                      |
| DogDMD_Off_15_i_R | TCACGCCAGTCATTTCTGAG                                      |
| DogDMD_Off_16_i_F | TCACACCAGTCATTTCTGAG                                      |
| DogDMD_Off_16_i_R | CCTGTCAAAGGTGGAAGCAT                                      |
| DogDMD_Off_17_i_F | CTGTCCCTGCACCCCTATTA                                      |
| DogDMD_Off_17_i_R | CCCAGCTCTTGTCTGGATGT                                      |
| DogDMD_Off_18_i_F | CCCTCGTCTCCAACAAATA                                       |
| DogDMD_Off_18_i_R | GGGGTCACACACCAGGTACT                                      |
| DogDMD_Off_1_DS_F | ACACTCTTTCCCTACACGACGCTCTTCCGATCTGACCAGAATCCAAGCCTCCT     |
| DogDMD_Off_1_DS_R | GTGACTGGAGTTCAGACGTGTGCTCTTCCGATCTCTGGACTGGTCAACTCAGCA    |
| DogDMD_Off_2_DS_F | ACACTCTTTCCCTACACGACGCTCTTCCGATCTCAAAGACCTGGGATTCCAAA     |
| DogDMD_Off_2_DS_R | GTGACTGGAGTTCAGACGTGTGCTCTTCCGATCTTTTCATTTAACTCAAACACAACG |
| DogDMD_Off_3_DS_F | ACACTCTTTCCCTACACGACGCTCTTCCGATCTGGTGTCCCTGTCTCAAGGTT     |
| DogDMD_Off_3_DS_R | GTGACTGGAGTTCAGACGTGTGCTCTTCCGATCTGATGGGTACAAAGGGCTGT     |
| DogDMD_Off_4_DS_F | ACACTCTTTCCCTACACGACGCTCTTCCGATCTGGAAGAGAGAGAGAGGGGAAA    |
| DogDMD_Off_4_DS_R | GTGACTGGAGTTCAGACGTGTGCTCTTCCGATCTGATTTGGCTCTTTGGCTGAA    |
| DogDMD_Off_5_DS_F | ACACTCTTTCCCTACACGACGCTCTTCCGATCTGCATTTTCTCTAAATGCCAGA    |
| DogDMD_Off_5_DS_R | GTGACTGGAGTTCAGACGTGTGCTCTTCCGATCTTCCATTGGGGTAAAGACTGG    |
| DogDMD_Off_6_DS_F | ACACTCTTTCCCTACACGACGCTCTTCCGATCTCTGGCCAAGGTTCTGTTTGT     |
| DogDMD_Off_6_DS_R | GTGACTGGAGTTCAGACGTGTGCTCTTCCGATCTTGTGTGTCTGGGCTGAGTTC    |
| DogDMD_Off_7_DS_F | ACACTCTTTCCCTACACGACGCTCTTCCGATCTGGGATGGAGTGCCAGTTTAA     |
| DogDMD_Off_7_DS_R | GTGACTGGAGTTCAGACGTGTGCTCTTCCGATCTCAGGGAGTCCAACACAGGAC    |
| DogDMD_Off_8_DS_F | ACACTCTTTCCCTACACGACGCTCTTCCGATCTTCACAGCAAACACTACCCCAA    |
| DogDMD_Off_8_DS_R | GTGACTGGAGTTCAGACGTGTGCTCTTCCGATCTAGGCTTGCCAGTGAAACATC    |
| DogDMD_Off_9_DS_F | ACACTCTTTCCCTACACGACGCTCTTCCGATCTCCTCTTGCTCCAAAGCTGTC     |

|                    |                                                          |
|--------------------|----------------------------------------------------------|
| DogDMD_Off_9_DS_R  | GTGACTGGAGTTCAGACGTGTGCTCTTCCGATCTGCTGGTAGGCTGCTCATCTC   |
| DogDMD_Off_10_DS_F | ACACTCTTTCCCTACACGACGCTCTTCCGATCTCAAAGCCAGAAGATGGAAGC    |
| DogDMD_Off_10_DS_R | GTGACTGGAGTTCAGACGTGTGCTCTTCCGATCTGGTGACCACCCTGGTTTCTA   |
| DogDMD_Off_11_DS_F | ACACTCTTTCCCTACACGACGCTCTTCCGATCTGTCAGACCTGCAGCAGACAA    |
| DogDMD_Off_11_DS_R | GTGACTGGAGTTCAGACGTGTGCTCTTCCGATCTGGGGGCTTTAGTCAGGGTAG   |
| DogDMD_Off_12_DS_F | ACACTCTTTCCCTACACGACGCTCTTCCGATCTAGGTCAGTGGGTACCTGTGC    |
| DogDMD_Off_12_DS_R | GTGACTGGAGTTCAGACGTGTGCTCTTCCGATCTATCTATCCACCCCTCCCATCC  |
| DogDMD_Off_13_DS_F | ACACTCTTTCCCTACACGACGCTCTTCCGATCTACCCCTGGCTTGTACCCATTT   |
| DogDMD_Off_13_DS_R | GTGACTGGAGTTCAGACGTGTGCTCTTCCGATCTAGTGCAAGCTGGAGTGTCTT   |
| DogDMD_Off_14_DS_F | ACACTCTTTCCCTACACGACGCTCTTCCGATCTGGTTTACCTGCGTCCTCTCA    |
| DogDMD_Off_14_DS_R | GTGACTGGAGTTCAGACGTGTGCTCTTCCGATCTCCCCCAGAAACACAGCTAAG   |
| DogDMD_Off_15_DS_F | ACACTCTTTCCCTACACGACGCTCTTCCGATCTGAAAAGCAGGCTCCCTGTAA    |
| DogDMD_Off_15_DS_R | GTGACTGGAGTTCAGACGTGTGCTCTTCCGATCTCATGTGAAAGTGGAGGTCCATA |
| DogDMD_Off_16_DS_F | ACACTCTTTCCCTACACGACGCTCTTCCGATCTCATGTGAAAGTGGAGGTCCATA  |
| DogDMD_Off_16_DS_R | GTGACTGGAGTTCAGACGTGTGCTCTTCCGATCTGAAAAGCAGGCTCCCTGTAA   |
| DogDMD_Off_17_DS_F | ACACTCTTTCCCTACACGACGCTCTTCCGATCTGGCTGGGCCCTACTCACTAT    |
| DogDMD_Off_17_DS_R | GTGACTGGAGTTCAGACGTGTGCTCTTCCGATCTGTCCATCTCATGGCTCGTCT   |
| DogDMD_Off_18_DS_F | ACACTCTTTCCCTACACGACGCTCTTCCGATCTGAGCCACTTGGTCTCCTCTG    |
| DogDMD_Off_18_DS_R | GTGACTGGAGTTCAGACGTGTGCTCTTCCGATCTTCTCCATGCAGTCCTCACAC   |
